# Supplementary material for: The landscape of MHC-presented phosphopeptides yields actionable shared tumor antigens for cancer immunotherapy across multiple HLA alleles
Source: PubMed Central journal article supplement — J Immunother Cancer. 2023 Sep 28;11(9):e006889. doi: 10.1136/jitc-2023-006889 (PMC10546156; doi:10.1136/jitc-2023-006889), 2023-09-28
Supplement: jitc-2023-006889supp005.pdf [file jitc-2023-006889supp005.pdf]

## Supplemental Information

**SI Table 1.** Sample descriptions and HLA typings of 12 samples from which we isolated HLA peptides and phosphopeptides, including 9 BLCLs, 1 healthy B cell, and 2 AMLs treated with either DMSO or decitabine.

| Sample Name         | Sample Description                                                  | Class I HLA                                                       |
|---------------------|---------------------------------------------------------------------|-------------------------------------------------------------------|
| BLCL HD1            | EBV B95.8-transformed B lymphoblastoid cell line from healthy donor | HLA-A11:01,HLA-A02:01,HLA-B27:04,HLA-B40:01,HLA-C07:02,HLA-C08:01 |
| BLCL HD2            | EBV B95.8-transformed B lymphoblastoid cell line from healthy donor | HLA-A02:01,HLA-A11:01,HLA-B07:02,HLA-C07:02                       |
| Healthy B cells HD3 | CD19+ B cells from peripheral blood of healthy donor                | HLA-A11:01,HLA-A26:01,HLA-B38:02,HLA-B56:01,HLA-C07:02,HLA-C01:02 |
| BLCL HD4            | EBV B95.8-transformed B lymphoblastoid cell line from healthy donor | HLA-A24:02,HLA-B35:02,HLA-C04:01                                  |
| BLCL HD5            | EBV B95.8-transformed B lymphoblastoid cell line from healthy donor | HLA-A02:01,HLA-B37:01,HLA-B51:01,HLA-C06:06,HLA-C15:02            |
| BLCL HD3            | EBV B95.8-transformed B lymphoblastoid cell line from healthy donor | HLA-A11:01,HLA-A26:01,HLA-B38:02,HLA-B56:01,HLA-C07:02,HLA-C01:02 |
| EBV-LPD1            | EBV+ lymphoma from EBV-PTLD patient                                 | HLA-A11:01,HLA-A29:02,HLA-B44:03,HLA-B35:02,HLA-C04:01,HLA-C16:01 |
| BLCL HD6            | EBV B95.8-transformed B lymphoblastoid cell line from healthy donor | HLA-A03:01,HLA-A24:02,HLA-B07:02,HLA-B18:01,HLA-C07:02,HLA-C07:01 |
| BLCL HD7            | EBV B95.8-transformed B lymphoblastoid cell line from healthy donor | HLA-A02:01,HLA-B44:02,HLA-B13:02,HLA-C05:01,HLA-C06:02            |
| BLCL HD8            | EBV B95.8-transformed B lymphoblastoid cell line from healthy donor | HLA-A02:01,HLA-A11:01,HLA-B08:01,HLA-B15:01,HLA-C07:01,HLA-C03:03 |
| OCI-AML2_DMSO       | OCI-AML2 cell line (RRID:CVCL_1619) treated with DMSO               | HLA-A02:01,HLA-B15:01,HLA-B18:01,HLA-C03:03,HLA-C07:01            |
| OCI-AML2_DCB        | OCI-AML2 cell line (RRID:CVCL_1619) treated with decitabine         | HLA-A02:01,HLA-B15:01,HLA-B18:01,HLA-C03:03,HLA-C07:01            |
| AML14_DMSO          | AML14 cell line (RRID:CVCL_8286) treated with DMSO                  | HLA-A02:01,HLA-A32:01,HLA-B44:02,HLA-B51:01,HLA-C05:01,HLA-C14:02 |
| AML14_DCB           | AML14 cell line (RRID:CVCL_8286) treated with decitabine            | HLA-A02:01,HLA-A32:01,HLA-B44:02,HLA-B51:01,HLA-C05:01,HLA-C14:02 |

**SI Table 2.** Phosphopeptides shared between healthy B cells and EBV-BLCL from HD3. Predicted affinities for each peptide and class I allele expressed by HD3 were computed by NetMHCpan4 based on the peptide's unmodified sequence. Predicted affinities are expressed in nM. Affinity values with the highest affinity (lowest nM value) of all predicted HLA allotypes in the same row are indicated in boldface.

| Protein | Peptide | ('affinity', 'HLA-A*11:01') | ('affinity', 'HLA-C*07:02') | ('affinity', 'HLA-A*26:01') | ('affinity', 'HLA-B*38:02') | ('affinity', 'HLA-B*56:01') | ('affinity', 'HLA-C*01:02') |
|---------|---------|-----------------------------|-----------------------------|-----------------------------|-----------------------------|-----------------------------|-----------------------------|
|---------|---------|-----------------------------|-----------------------------|-----------------------------|-----------------------------|-----------------------------|-----------------------------|

|         |            |         |         |         |         |         |         |
|---------|------------|---------|---------|---------|---------|---------|---------|
| HIPK2   | AISsPQRSK  | 103.1   | 32094.4 | 37861   | 46988.2 | 39612.7 | 37750.6 |
| SRRM2   | ATAsPPRQK  | 51      | 30260.2 | 31972.4 | 47055.8 | 39826.7 | 37717.5 |
| GPATCH8 | GSGsPAPPR  | 248.4   | 36269.2 | 39943.2 | 46585.2 | 42231.6 | 40021.5 |
| TRA2B   | RPHTPTPGI  | 32655.2 | 13780.2 | 37088.6 | 26534   | 2317.6  | 11705.7 |
| FAM21C  | RPTsFADEL  | 32714.6 | 13044.7 | 37727.7 | 10572.1 | 3991.8  | 10121   |
| POLL    | RPVsPPQKA  | 38495.9 | 31389.4 | 41729.7 | 40007.2 | 1623    | 31209.2 |
| PPP1CB  | RPVtPPRTA  | 38114.6 | 24741.7 | 41651.2 | 37283.8 | 941.7   | 24474.1 |
| RCSD1   | SPKsPGLKA  | 36512.9 | 30029   | 37156.1 | 41452.1 | 935     | 31314.4 |
| SRSF5   | SVSRsPVPEK | 20.4    | 29960.8 | 31655.4 | 46047   | 34732.2 | 39368.7 |
| MGA     | SVSsPVKSK  | 34.2    | 25252.3 | 25526.4 | 45669.4 | 34245.2 | 34320.5 |

**SI Figure 1:** IRS2 Ser1100 phosphorylation levels in CPTAC colorectal cancer (Vasaikar et al. *Cell*. (2019)) samples profiled for mutations in PPP1CA, encoding the PP1A phosphatase. Data accessed in cBioPortal.

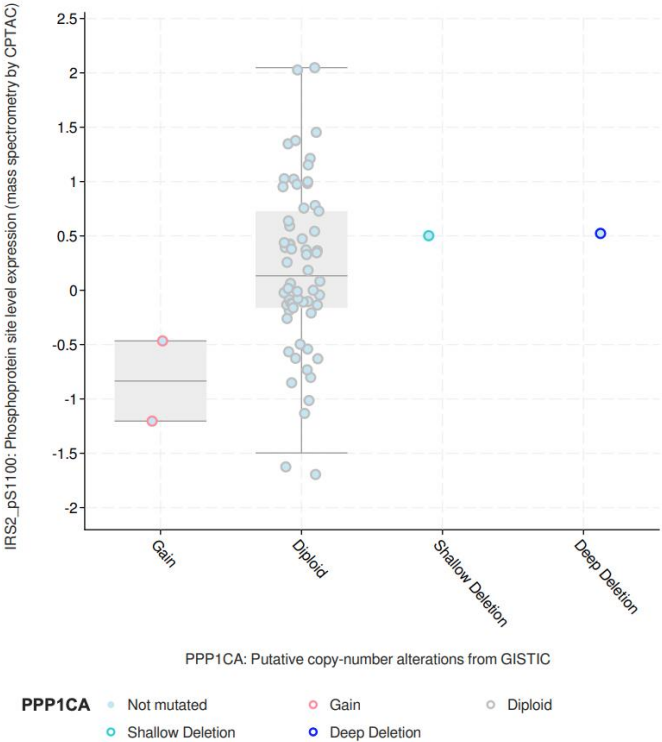

**SI Figure 2:** Kinases enrichment analysis using KEA3 of parental genes of phosphopeptides represented in HLA-A3/A11+ solid or heme tumors. (A) Kinases enriched in the gene set of phosphopeptides only represented in solid tumors but not heme tumors. (B) Kinases enriched in the gene set of phosphopeptides only in heme, but not solid tumors. Kinases are ranked by their MeanRank, with MeanRank decreasing from bottom to top, and plotted against the sum of their ranks in each of the kinase libraries, which are indicated by color.

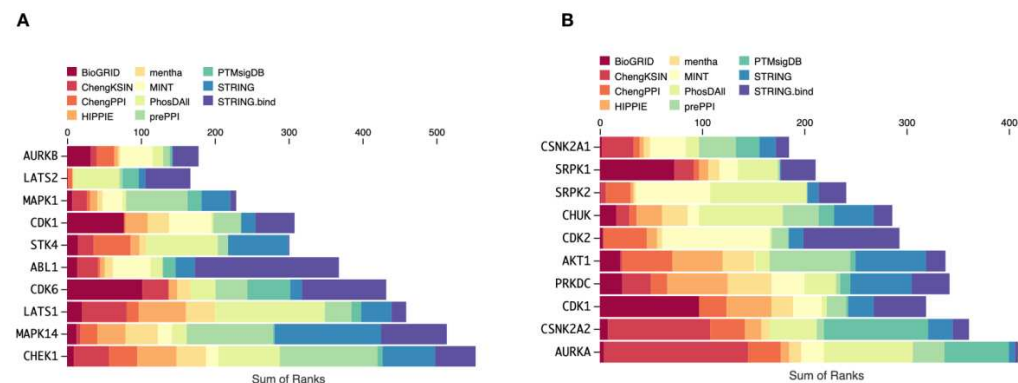

**SI Table 3:** NetMHCphosPan-1.0-predicted affinities of HLA-A\*03:01-binding phosphopeptides. %rank\_el indicates percentile rank (%rank). BindLevel indicates binding strength of peptide; strong binders are defined as having %rank<0.5, and weak binders with %rank<2. Peptides were used to evaluate T cell responses in Figures 5A-J.

| Name     | Sequence    | HLA-A03:01 %rank_el | BindLevel     |
|----------|-------------|---------------------|---------------|
| pSRRM1   | RTApSPPPPPK | 0.0091              | Strong Binder |
| pMGAP    | SVSpSPVKSK  | 0.0038              | Strong Binder |
| pHIF1a   | RTApSPNRAGK | 0.0038              | Strong Binder |
| pPRDM2   | RTApSPPALPK | 0.0019              | Strong Binder |
| pMYBBP1a | ATQpSPISKK  | 0.0032              | Strong Binder |

**SI Figure 3:** Baseline levels of HLA-C expressed as geometric mean fluorescence intensity (gMFI) on T2-C\*07:01 and T2-C\*07:02 cells after performing incubation steps described in methods section without the presence of a peptide but with B2M. Significance assessed by independent t-test.

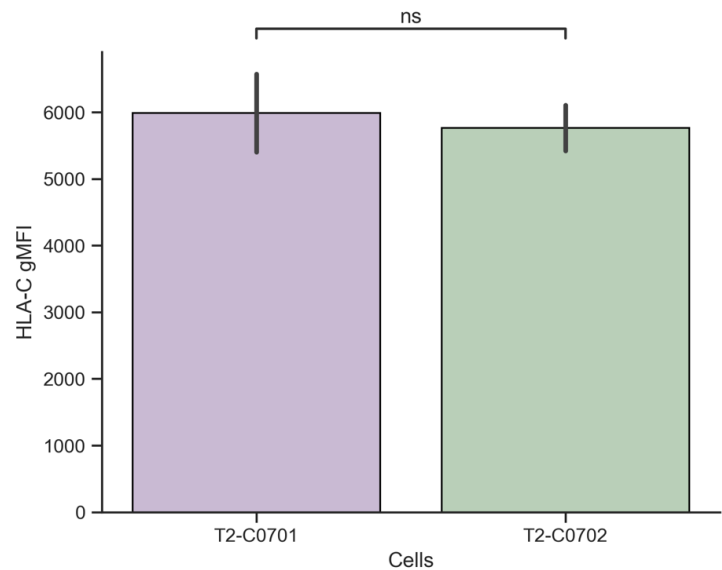

**SI Table 4:** Hydrogen bond analysis of pNCOR/C0701 and pNCOR/C0702 models. Hbond donor and acceptor residues suffixed with .A indicate residues on HLA and .B indicates residues on peptide. Boldfaced residue pairs indicates hydrogen bonds mutually exclusive to each complex.

| Model       | Average score of top 10 complexes (REU) | Hbond donor      | Hbond acceptor  |
|-------------|-----------------------------------------|------------------|-----------------|
| pNCOR/C0701 | -461                                    | ASN 80.A         | PHE 9.B         |
|             |                                         | THR 143.A        | PHE 9.B         |
|             |                                         | LYS 146.A        | PHE 9.B         |
|             |                                         | <b>TYR 159.A</b> | <b>ARG 1.B</b>  |
|             |                                         | ARG 1.B          | TYR 7.A         |
|             |                                         | ARG 1.B          | TYR 171.A       |
|             |                                         | ARG 2.B          | GLU 63.A        |
|             |                                         | ARG 2.B          | GLU 63.A        |
|             |                                         | <b>ARG 2.B</b>   | <b>TYR 99.A</b> |
|             |                                         | ARG 2.B          | ASP 9.A         |
|             |                                         | <b>ARG 2.B</b>   | <b>TYR 99.A</b> |
|             |                                         | LEU 6.B          | GLN 70.A        |
|             |                                         | PHE 9.B          | SER 77.A        |
|             |                                         |                  |                 |
| pNCOR/C0702 | -327                                    | <b>ARG 69.A</b>  | <b>SEP 4.B</b>  |
|             |                                         | ASN 80.A         | PHE 9.B         |
|             |                                         | THR 143.A        | PHE 9.B         |
|             |                                         | LYS 146.A        | PHE 9.B         |
|             |                                         | LYS 146.A        | PHE 9.B         |
|             |                                         | ARG 1.B          | TYR 7.A         |
|             |                                         | ARG 1.B          | TYR 171.A       |
|             |                                         | <b>ARG 1.B</b>   | <b>GLU 63.A</b> |
|             |                                         | ARG 2.B          | GLU 63.A        |
|             |                                         | ARG 2.B          | ASP 9.A         |
|             |                                         | LEU 6.B          | GLN 70.A        |
|             |                                         | PHE 9.B          | SER 77.A        |
