# Supplementary material for: The landscape of MHC-presented phosphopeptides yields actionable shared tumor antigens for cancer immunotherapy across multiple HLA alleles
Source: PubMed Central journal article supplement — J Immunother Cancer. 2023 Sep 28;11(9):e006889. doi: 10.1136/jitc-2023-006889 (PMC10546156; doi:10.1136/jitc-2023-006889), 2023-09-28
Supplement: jitc-2023-006889supp007.pdf [file jitc-2023-006889supp007.pdf]

# The landscape of MHC-presented phosphopeptides yields actionable shared tumor antigens for cancer immunotherapy across multiple HLA alleles

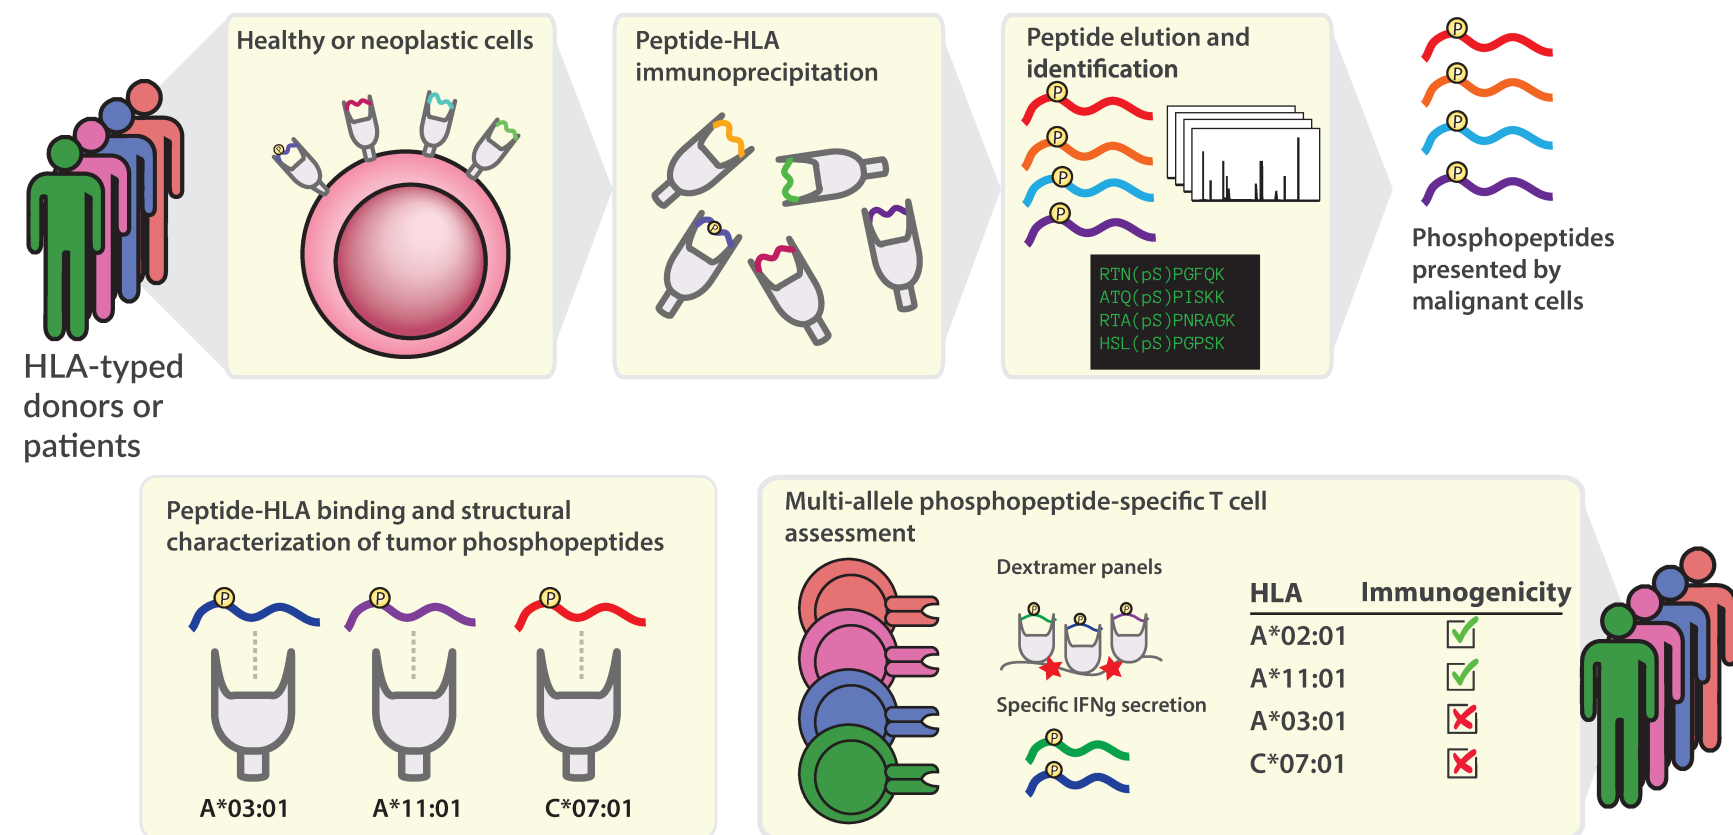

## Authors

Zaki Molvi, Martin G. Klatt, Tao Dao, Jessica Urraca, David A. Scheinberg, Richard J. O'Reilly

## Correspondence

[zaki.molvi@gmail.com](mailto:zaki.molvi@gmail.com); [oreillyr@mskcc.org](mailto:oreillyr@mskcc.org)

## In Brief

Phosphopeptides that are derived from genetic dependencies in hematologic malignancies and are presented by multiple human leukocyte antigen (HLA) alleles represent shared tumor antigens that could be targeted for cancer immunotherapy, but the immunogenicity of such phosphopeptides is not a general feature, which may be explained by the energetics of the peptide-HLA complex.
